# Supplementary material for: Leveraging large-scale Mycobacterium tuberculosis whole genome sequence data to characterise drug-resistant mutations using machine learning and statistical approaches
Source: PubMed Central journal article supplement (PMC11544221; doi:10.1038/s41598-024-77947-w), 2024-11-07
Supplement: 41598_2024_77947_MOESM1_ESM.pdf [file 41598_2024_77947_MOESM1_ESM.pdf]

# Leveraging large-scale *Mycobacterium tuberculosis* whole genome sequence data to characterise drug-resistant mutations using machine learning and statistical approaches

Siddharth Sanjay Pruthi<sup>1,2</sup>, Nina Billows<sup>1</sup>, Joseph Thorpe<sup>1</sup>, Susana Campino<sup>1</sup>, Jody E. Phelan<sup>1,\*</sup>, Fady Mohareb<sup>2,\*</sup>, Taane G. Clark<sup>1,3,\*\*</sup>

<sup>1</sup>Faculty of Infectious and Tropical Diseases, London School of Hygiene & Tropical Medicine, WC1E 7HT London, UK

<sup>2</sup>School of Water, Energy and Environment, Cranfield University, Bedford, UK.

<sup>3</sup>Faculty of Epidemiology and Population Health, London School of Hygiene & Tropical Medicine, WC1E 7HT London, UK

\* Joint authors

\*\* Corresponding author: Prof. Taane G. Clark, Department of Infection Biology, Faculty of Infectious and Tropical Diseases, London School of Hygiene & Tropical Medicine, Keppel Street, London, UK

## Supplementary Figures

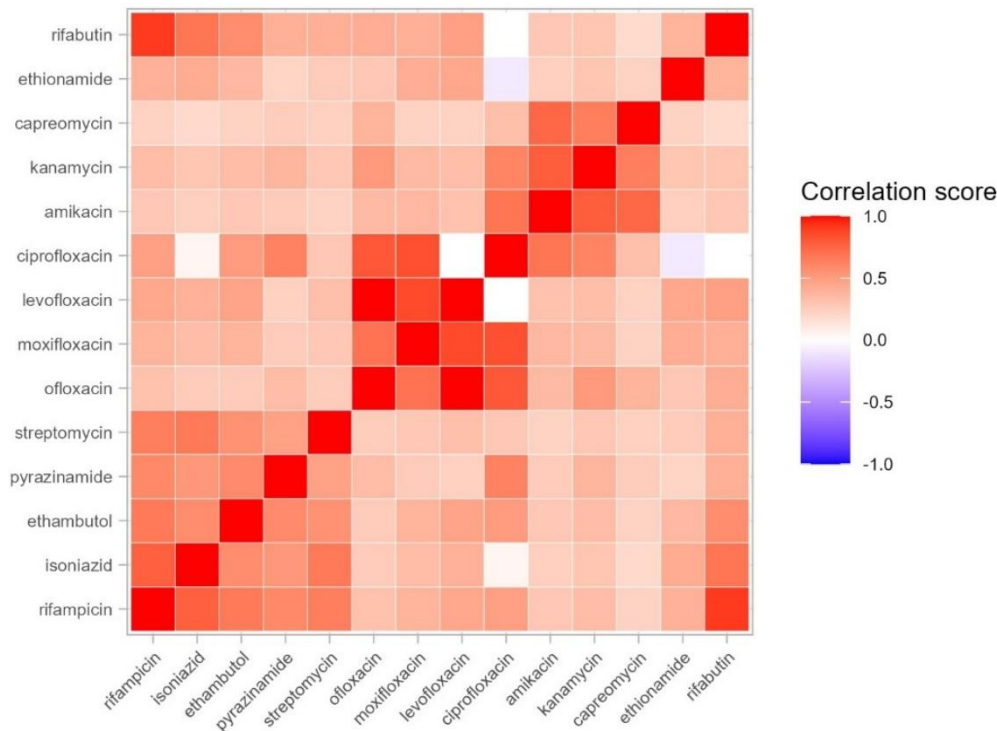

**Figure S1. Pearson correlation between resistance phenotypes across 14 drugs.**

Pearson correlation coefficients were calculated between MIC values for 14 drugs. Correlation scores are coloured on the heatmap to indicate strong resistance co-occurrence between drugs.

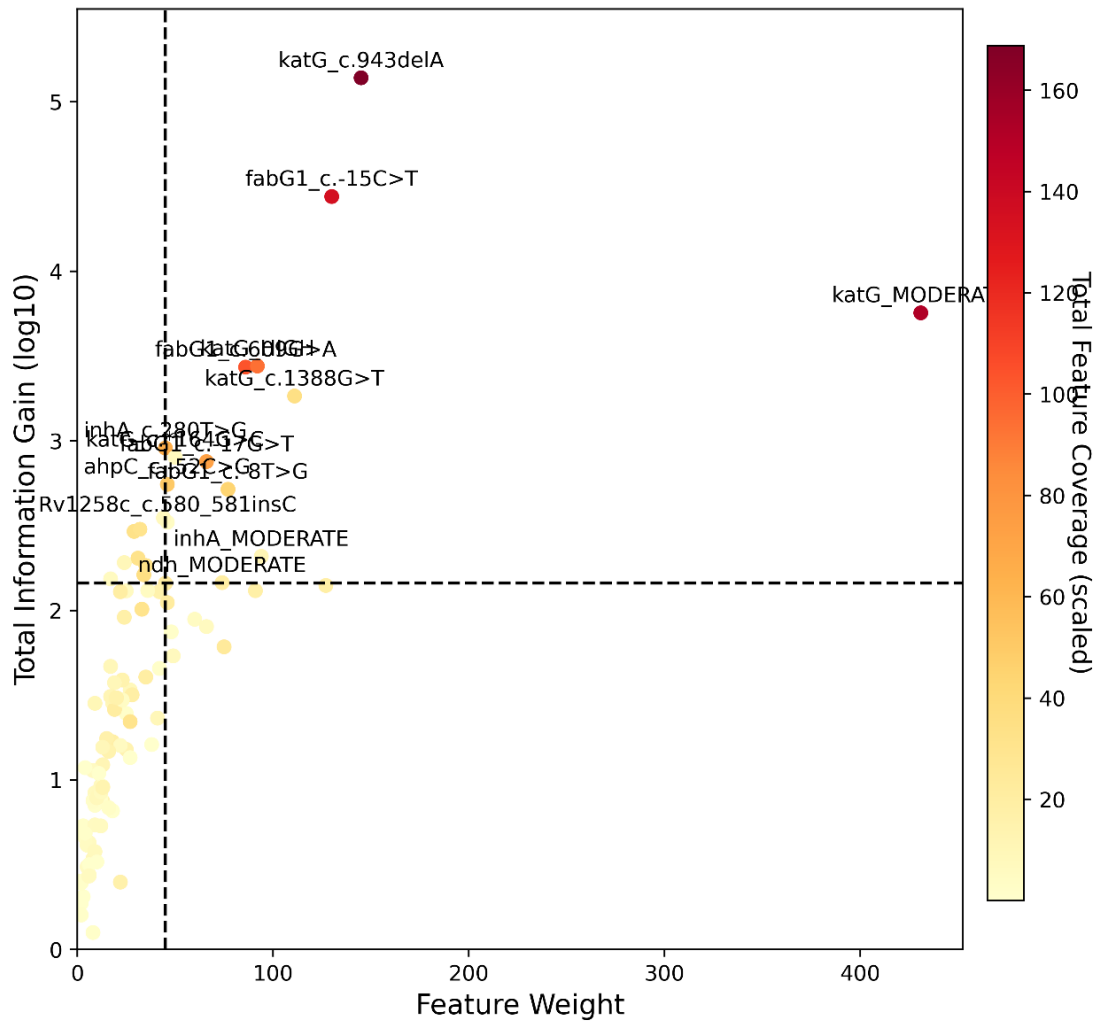

**Figure S2. Feature importance and feature coverage for isoniazid (INH)**

Representation of feature importance values across *Information Gain*, *Feature Coverage* (average number of instances affected by the feature), and *Feature Weight* (number of times the feature appears across all trees) in models (GBT-F1+ counts) for INH. Values labelled if in the 20<sup>th</sup>-percent-tile across both *Information Gain* and *Feature Weight*.

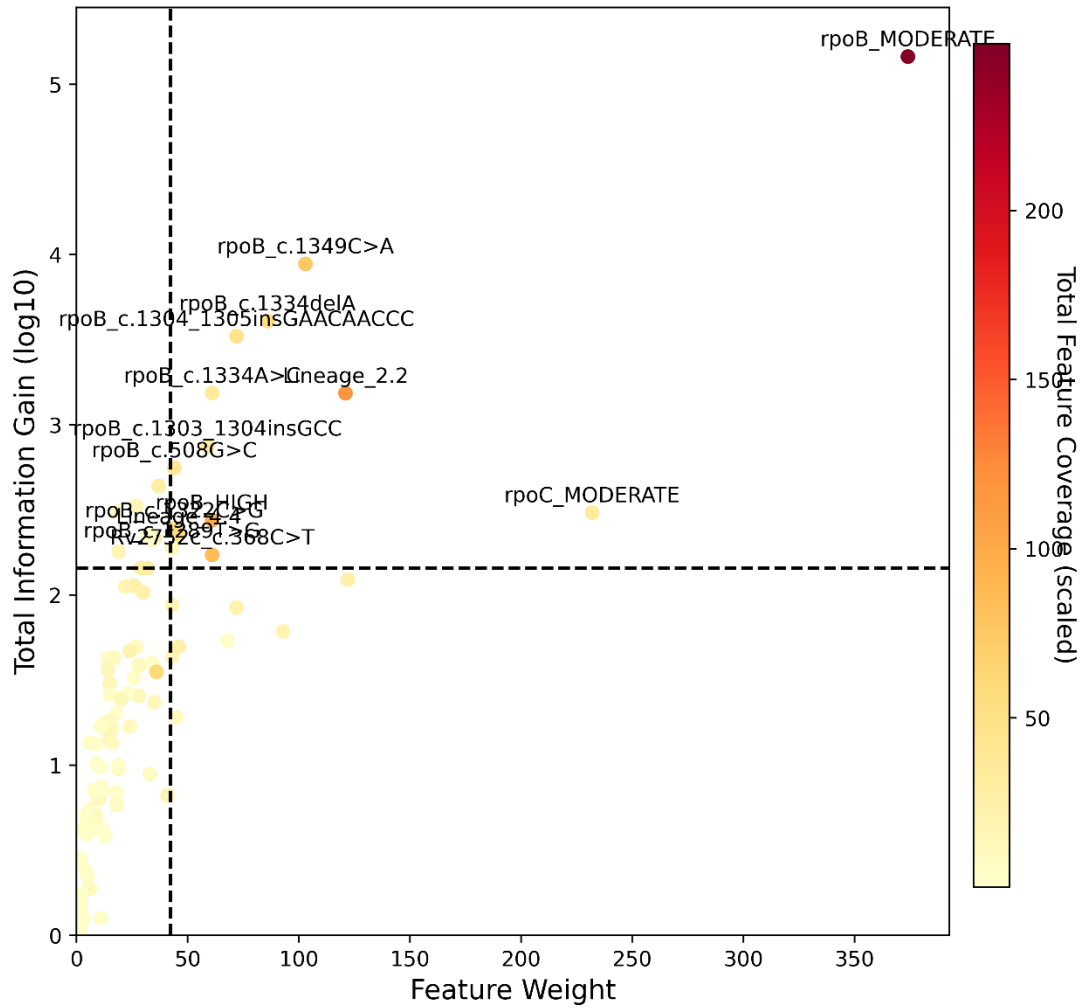

**Figure S3. Feature importance and feature coverage for rifampicin (RIF)**

Representation of feature importance values across *Information Gain*, *Feature Coverage* (average number of instances affected by the feature), and *Feature Weight* (number of times the feature appears across all trees) in models (GBT-F1+ counts) for RIF. Values labelled if in the 20<sup>th</sup>-percentile across both *Information Gain* and *Feature Weight*.

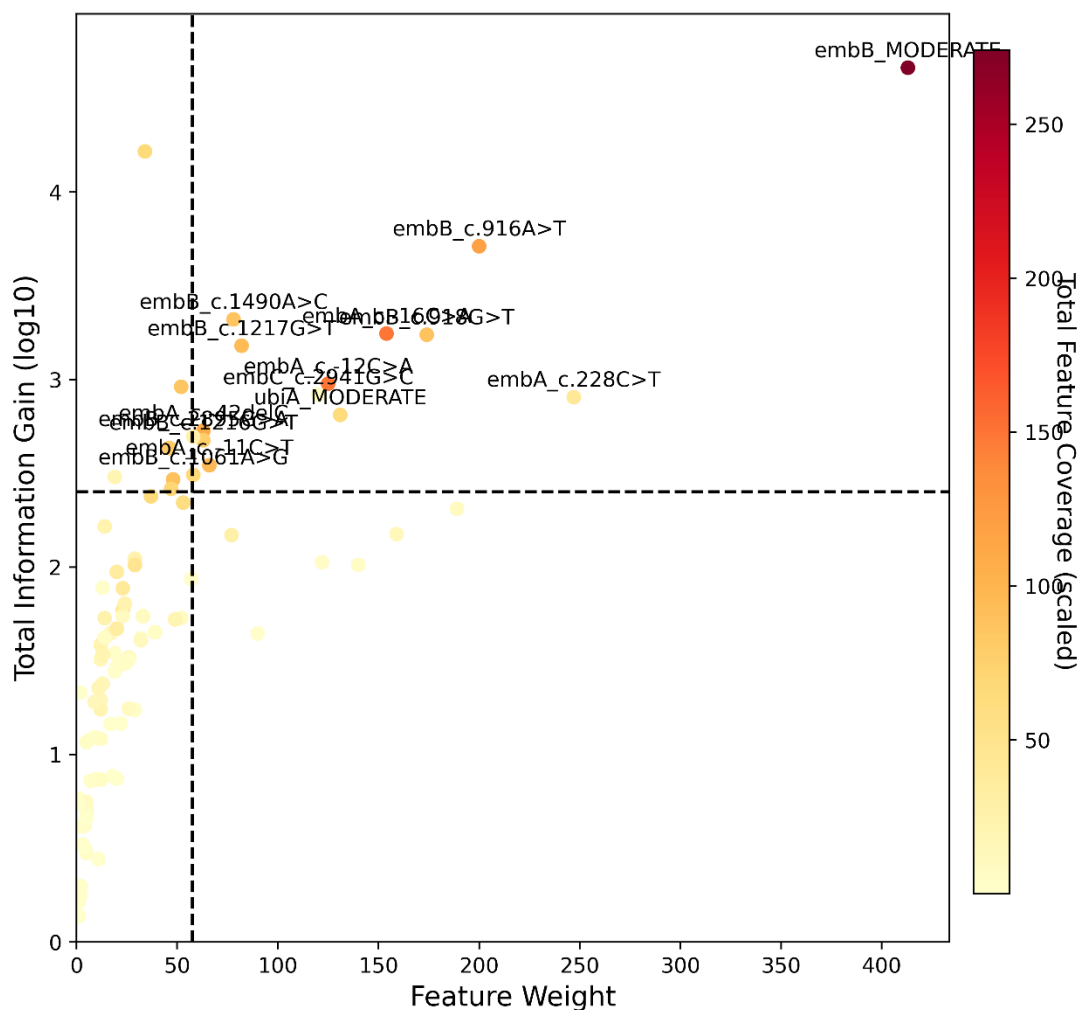

**Figure S4. Feature importance and feature coverage for ethambutol (EMB)**

Representation of feature importance values across *Information Gain*, *Feature Coverage* (average number of instances affected by the feature), and *Feature Weight* (number of times the feature appears across all trees) in models (GBT-F1+ counts) for EMB. Values labelled if in the 20<sup>th</sup>-percentile across both *Information Gain* and *Feature Weight*.

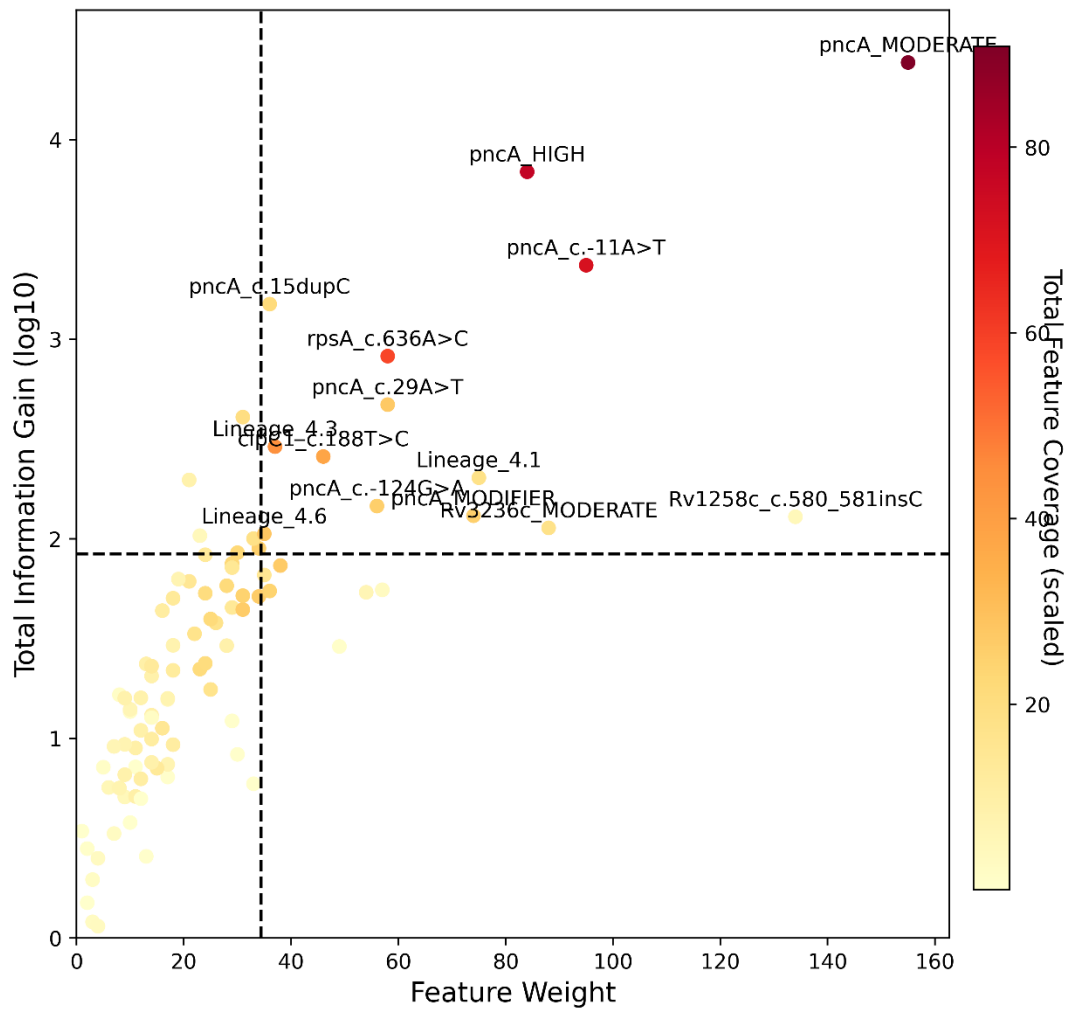

**Figure S5. Feature importance and feature coverage for pyrazinamide (PZA)**

Representation of feature importance values across *Information Gain*, *Feature Coverage* (average number of instances affected by the feature), and *Feature Weight* (number of times the feature appears across all trees) in models (GBT-F1+ counts) for PZA. Values labelled if in the 20<sup>th</sup>-percent-tile across both *Information Gain* and *Feature Weight*.

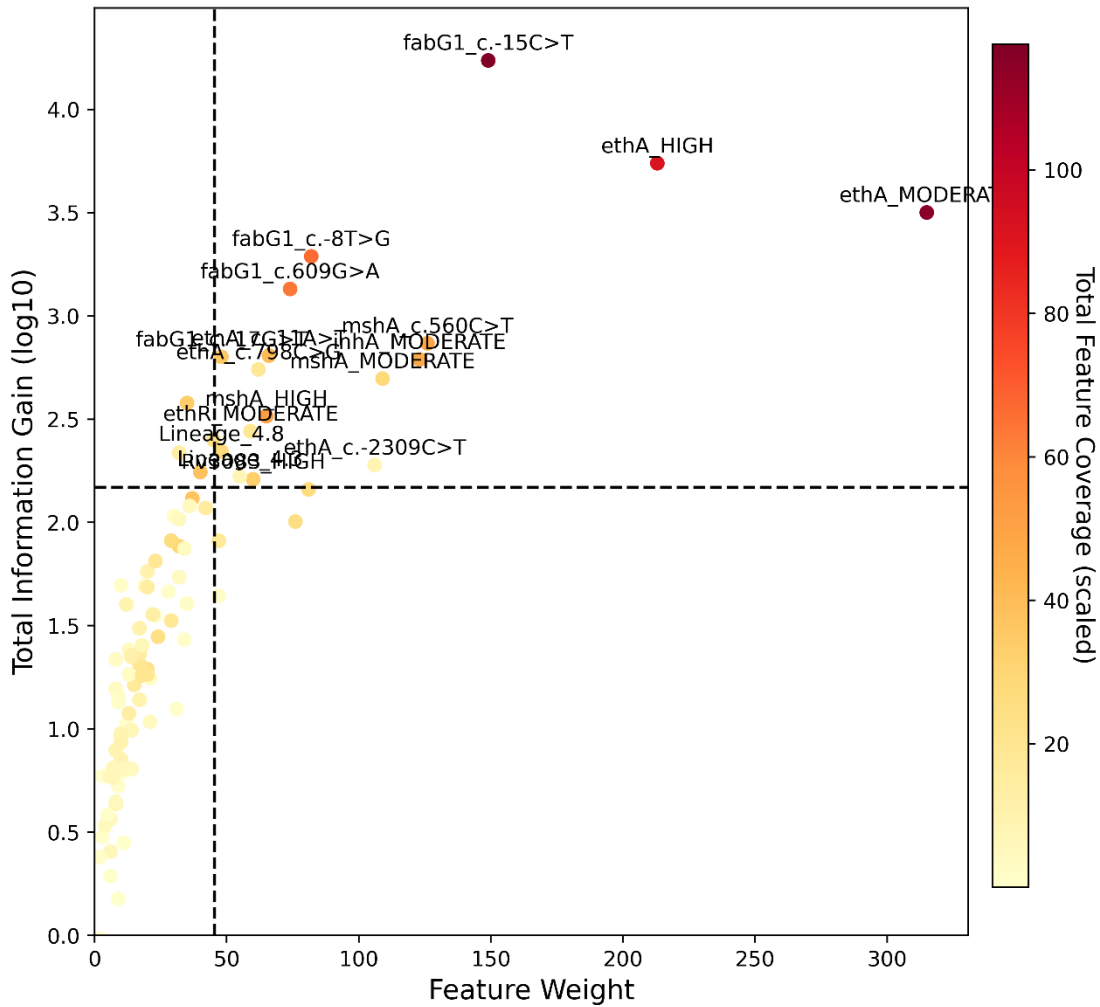

**Figure S6. Feature importance and feature coverage for ethionamide (ETH)**

Representation of feature importance values across *Information Gain*, *Feature Coverage* (average number of instances affected by the feature), and *Feature Weight* (number of times the feature appears across all trees) in models (GBT-F1+ counts) for ETH. Values labelled if in the 20<sup>th</sup>-percent-tile across both *Information Gain* and *Feature Weight*.

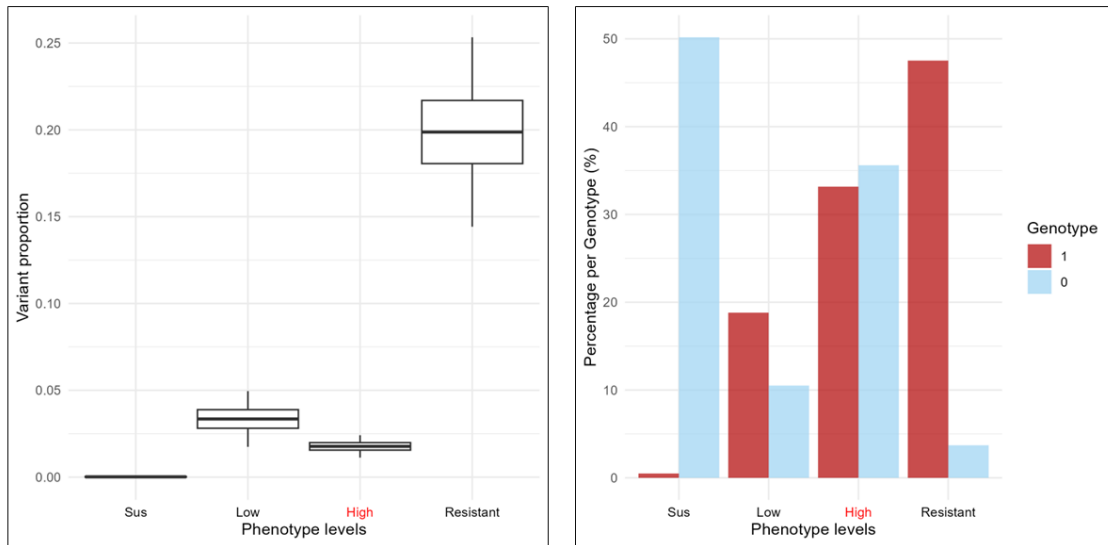

**Figure S7. Distribution of *inhA* -c.779/*fabG1* -17G>T across isoniazid (INH) minimum inhibitory concentration (MIC) phenotypes.**

Allele frequencies (left) and genotype distribution (right) of variant across ordinal MIC phenotypes for INH.

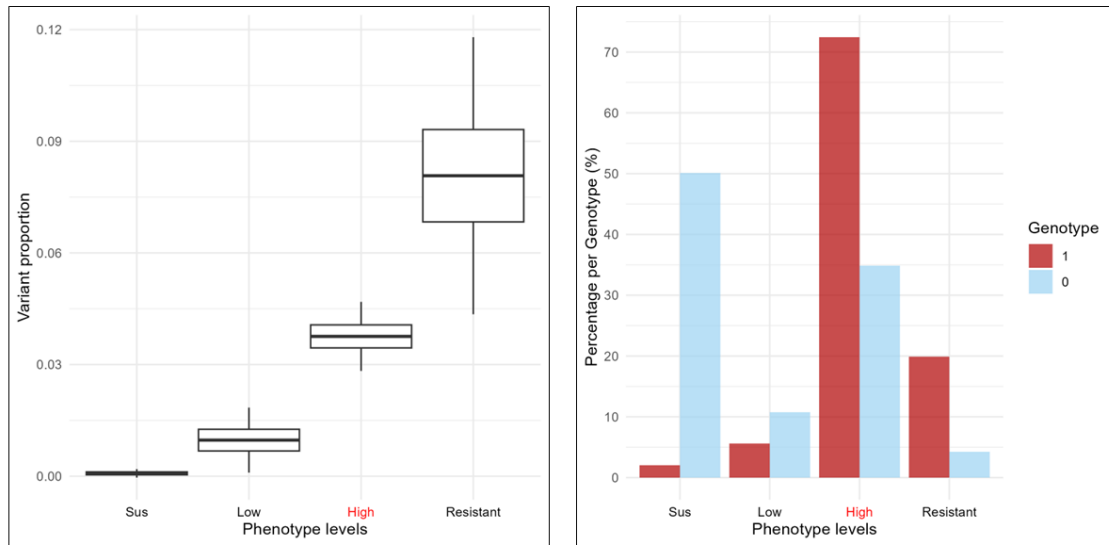

**Figure S8. Distribution of *inhA* -c.770/*fabG1* -8T>C/G across isoniazid (INH) minimum inhibitory concentration (MIC) phenotypes**

Allele frequencies (left) and genotype distribution (right) of variant across ordinal MIC phenotypes for INH.



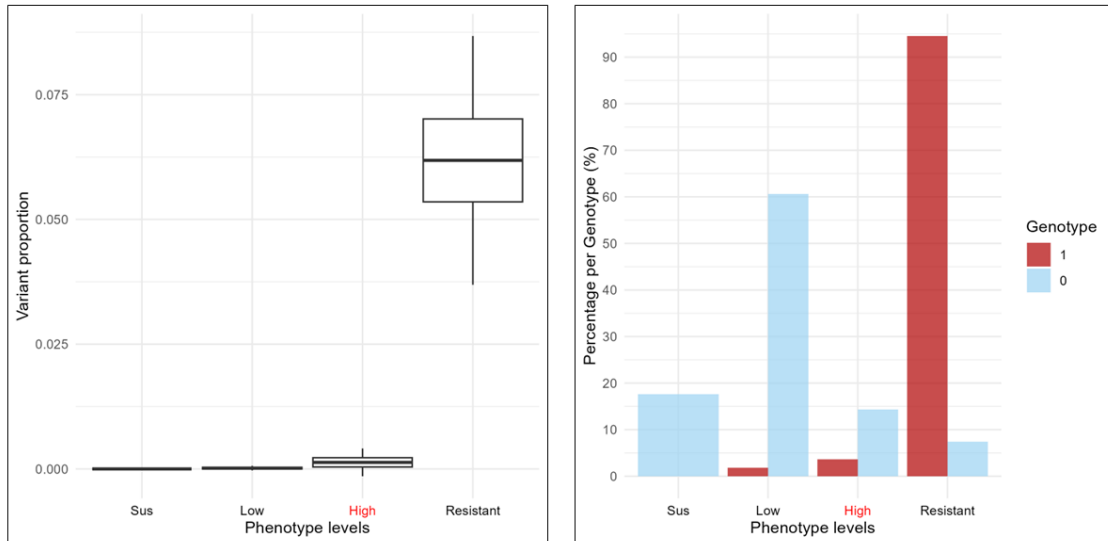

**Figure S9. Distribution of *inhA* c.62T>C across ethionamide (ETH) minimum inhibitory concentration (MIC) phenotypes**

Allele frequencies (left) and genotype distribution (right) of variant across ordinal MIC phenotypes for ETH.

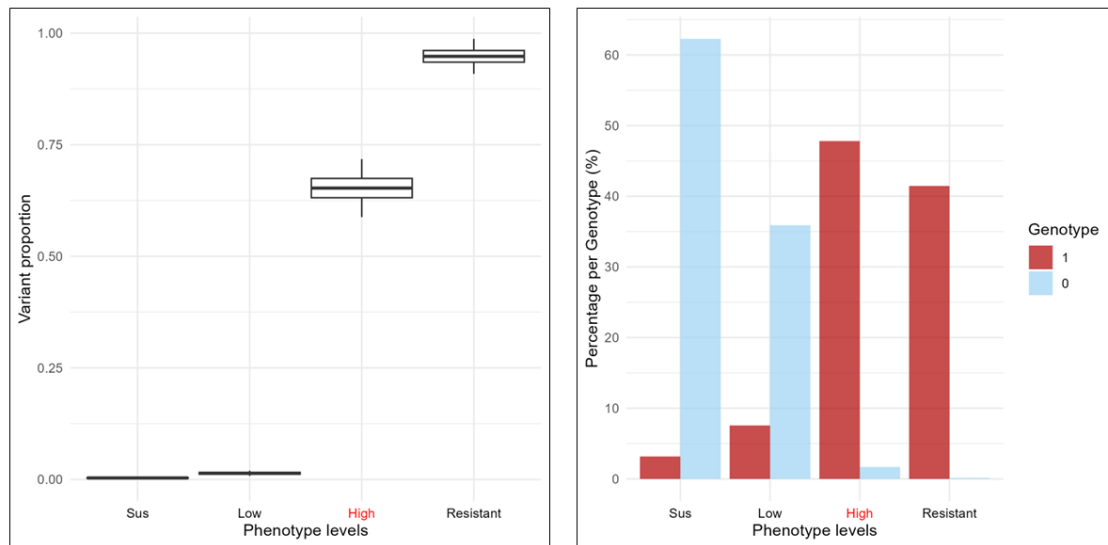

**Figure S10. Distribution of *Rv1313c* c.-3471T>C across amikacin (AMK) minimum inhibitory concentration (MIC) phenotypes**

Allele frequencies (left) and genotype distribution (right) of variants across ordinal MIC phenotypes for AMK.

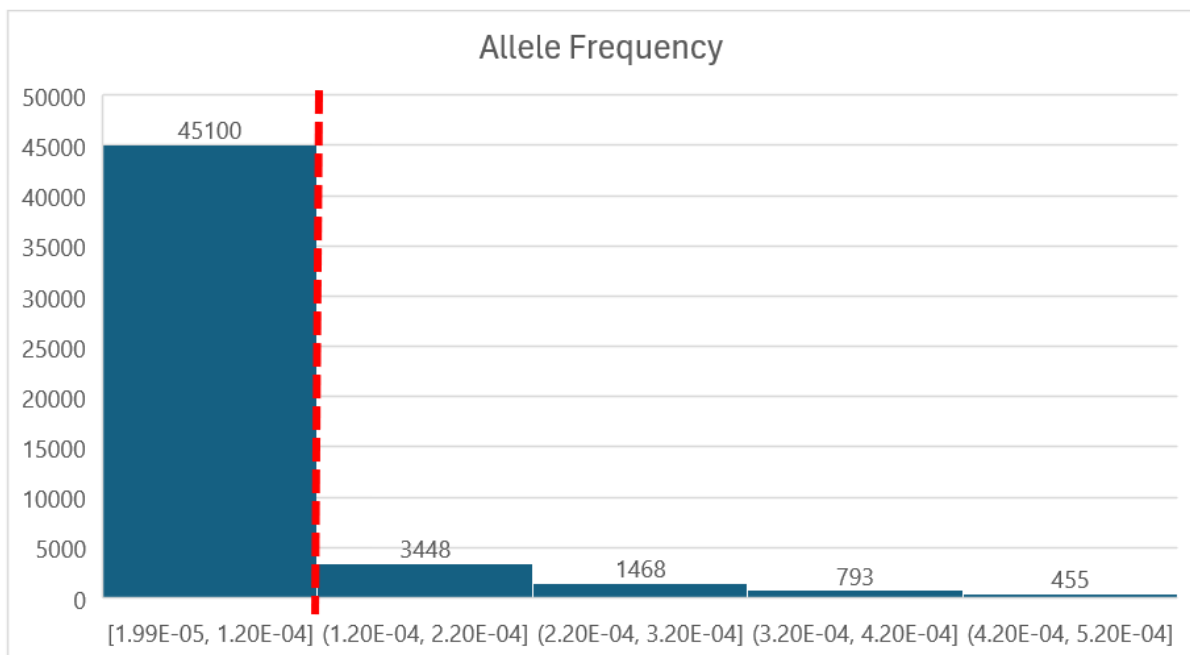

**Figure S11. Allele frequency histogram of variants in drug-resistance genes**

Allele frequencies of variants in drug-resistance genes with non-major allele frequency (MAF <0.005) are shown to highlight how the MAF threshold of 0.1% was determined. The dashed line indicates a threshold of 0.0001.
